## **Protocol**

Equations for Estimating Basal and Resting Metabolic Rates: A Scoping Review Protocol

## **Author(s)**

Veronika Pourová,<sup>1,\*</sup> Alena Langaufová,<sup>2</sup> Abanoub Riad<sup>1,3</sup>

## **Affiliation(s)**

<sup>1</sup> Department of Public Health, Faculty of Medicine, Masaryk University, Brno, Czech Republic

<sup>2</sup> Department of Health Sciences, Faculty of Medicine, Masaryk University, Brno, Czech Republic

<sup>3</sup> Masaryk Centre for Global Health (MCGH), Department of Public Health, Faculty of Medicine, Masaryk University, Brno, Czech Republic

## **Corresponding Author**

Ing. Mgr. Veronika Pourová

Department of Public Health, Faculty of Medicine, Masaryk University, 625 00 Brno, Czech Republic

[veronika@nehladu.cz](mailto:veronika@nehladu.cz)

## **Keyword(s)**

Basal Metabolic Rate; Energy Expenditure; Evidence-Based Healthcare; Indirect Calorimetry; Resting Metabolic Rate

## 1 **Abstract**

### 2 *Objective*

3 This scoping review aims to map the existing equations used for estimating basal and resting metabolic  
4 rates and to specify their applicability to various population groups, particularly in cases where they  
5 demonstrate higher accuracy based on age, ethnicity, and body mass index (BMI).

### 6 *Methods*

7 The proposed scoping review will be conducted in accordance with the JBI methodology for scoping  
8 reviews and reported following the Preferred Reporting Items for Systematic Reviews and Meta-Analyses  
9 for Scoping Reviews (PRISMA-ScR). A comprehensive search strategy has been developed to identify  
10 both published and unpublished studies. The literature search will be conducted in the following  
11 databases: MEDLINE (Ovid), EMBASE (Ovid), SportDiscus (EBSCO), and ClinicalTrials.gov. Abstracts  
12 will be screened against the inclusion criteria, and the full text of all potential studies will be reviewed by  
13 two independent researchers. Data will be extracted using a pre-designed data extraction sheet and  
14 presented in tabular form and as a narrative summary.

### 15 *Results*

16 The findings of this review will be disseminated through publication in a peer-reviewed journal and  
17 presented as an abstract at specialty conferences.

### 18 *Conclusion*

19 To the best of the authors' knowledge, this review will be the first to comprehensively map all existing  
20 equations for both basal and resting metabolic rates. It is also a pioneering effort in synthesising evidence  
21 on the accuracy of these equations.

### 22 *Open Science Framework (OSF) Registration*

23 This project has been registered at OSF since October 3<sup>rd</sup>, 2024.  
24 <https://doi.org/10.17605/OSF.IO/UD4WB>

## 25 **Introduction**

### 26 *Rationale*

27 The treatment of obesity is multifaceted and requires the involvement of a multidisciplinary team,  
28 including dietitians, physiotherapists, physicians, and psychologists. Obese patients often experience  
29 a history of repeated cycles of weight loss and regain, making the accurate assessment of their energy  
30 needs crucial for developing appropriate dietary plans.<sup>1</sup> Understanding these energy requirements is  
31 essential for setting an adequate energy intake that preserves muscle mass, supports overall tissue  
32 function, and reduces excess body fat.<sup>1,2</sup>

33 One of the most accurate methods for measuring resting energy expenditure (REE) is indirect  
34 calorimetry, which provides a direct measurement of a patient's metabolic rate.<sup>3</sup> However, this  
35 method requires significant technical and clinical expertise, and its application is relatively time-  
36 consuming and costly.<sup>3,4</sup> In 2011, it was accessible to only about 18% of nutrition professionals in the  
37 UK.<sup>5</sup> As such, its routine use in clinical practice is limited by resource constraints.<sup>3-5</sup>

38 In clinical settings where indirect calorimetry is unavailable, predictive equations are commonly  
39 employed to estimate REE and inform dietary planning. These equations typically consider variables  
40 such as body weight, height, age, and sex, with some incorporating additional factors such as fat-free  
41 mass and disease-specific parameters. For these equations to be deemed accurate, they should exhibit  
42 an error rate of less than 10% when compared to indirect calorimetry. However, the current literature  
43 indicates that even the most accurate predictive equations achieve this level of precision in only 73%  
44 of patients within specific body mass index (BMI) categories.<sup>6-8</sup>

45 Selecting the appropriate equation for a given patient population is critical to ensuring accurate  
46 estimation of energy needs when indirect calorimetry is not feasible. Therefore, a systematic and  
47 comprehensive review of existing predictive equations, including their accuracy and applicability to  
48 specific patient subgroups, is urgently needed to guide clinical decision-making in the management of  
49 obesity.

### 50 *Review Question(s)*

51 This scoping review aims to explore the current landscape of equations used to estimate basal and  
52 resting metabolic rates (BMR and RMR) and their accuracy across different population groups.  
53 Therefore, it was designed to answer the following questions:

54 I. What are the existing equations used to estimate BMR and RMR?

- 55 II. Which population groups have been studied in the development of equations for estimating BMR  
56 and RMR?  
57 III. How do these equations differ in terms of accuracy across specific population groups?

58 **Inclusion Criteria**

59 *Participants*

60 This review will include studies involving individuals from all demographic groups, with no  
61 exclusions based on age, gender, ethnicity, medical history, or BMI, thereby ensuring comprehensive  
62 coverage of diverse populations.

63 *Concept*

64 This review will explore the various equations used to estimate basal and BMR and RMR and how  
65 they compare to indirect calorimetry. The focus will be on identifying, mapping, and synthesising  
66 evidence related to the accuracy and applicability of these equations in estimating resting energy  
67 expenditure (REE) across diverse populations.

68 *Context*

69 This review will consider studies conducted in any geographic location and in various settings,  
70 including clinical, non-clinical, and research environments. It will account for factors such as cultural,  
71 racial, and gender influences that may impact metabolic rate estimates, aiming to provide a  
72 comprehensive understanding of how these equations perform across different population groups and  
73 contexts.

74 *Types of Sources*

75 This review will include all analytical observational studies, such as cross-sectional, case-control, and  
76 cohort studies, that have utilised equations for measuring BMR and RMR. Eligible studies should  
77 compare the equations with indirect calorimetry.

78 **Methods**

79 The proposed scoping review will be conducted according to the Joanna Briggs Institute (JBI)  
80 methodology for scoping reviews and will be reported as per the Preferred Reporting Items for  
81 Systematic Reviews and Meta-analyses for Scoping Reviews (PRISMA-ScR).<sup>9,10</sup>

82 *Search Strategy*

83 A comprehensive three-phase search strategy was developed to locate both published and  
84 unpublished studies. In the first phase, an initial limited search of MEDLINE (Ovid) was conducted  
85 to identify relevant articles. In the second phase, a detailed literature search was carried out across  
86 multiple databases, including MEDLINE (Ovid), EMBASE (Ovid), SportDiscus (EBSCO), and  
87 ClinicalTrials.gov, using all identified keywords and index terms.

88 To cover grey literature, sources such as SportDiscus and ClinicalTrials.gov were included. The  
89 search focused on identifying all studies related to "resting energy expenditure" and "predictive  
90 equations." No language or publication restrictions were applied to ensure a comprehensive search.

91 In the final phase, citation tracking will be conducted, where the reference lists of all studies meeting  
92 the inclusion criteria will be checked for additional relevant studies.

93 *Selection Process*

94 Two independent reviewers will screen all retrieved articles in accordance with the inclusion criteria.  
95 In the initial screening phase, articles will be assessed based on their titles and abstracts. In the second  
96 phase, full-text screening will be conducted to determine the final inclusion of studies in the scoping  
97 review. Any disagreements between the two reviewers during the screening process will be resolved  
98 through consultation with a third reviewer. The study selection process will be illustrated using a  
99 PRISMA flow diagram, detailing each stage of the review.

100 *Data Extraction*

101 Data will be extracted from all included studies using a structured data extraction sheet designed  
102 specifically for this review. The extracted data will include study characteristics (e.g., author, year of  
103 publication, study design, and sample size), details of the predictive equations for BMR and RMR,  
104 comparison with indirect calorimetry, and reported outcomes related to accuracy and applicability.

105 Two independent reviewers will perform the data extraction to ensure consistency and accuracy,  
106 resolving any discrepancies through discussion or by consulting a third reviewer if necessary.

107 *Data Analysis & Presentation*

108 Data from the included studies will be synthesised qualitatively and will be presented in tabular form,  
109 accompanied by a narrative summary to highlight the accuracy and applicability of the various  
110 equations for estimating BMR and RMR. Graphical representations may be used to visually  
111 summarise trends and differences across population groups.

112        **Acknowledgements**

113        The authors would like to thank Masaryk University Campus Library (KUK) for providing access to  
114        the necessary databases essential for conducting this scoping review.

115        **Funding**

116        The work of A.R. is supported by the NPO "Systemic Risk Institute" no. LX22NPO5101, funded by  
117        European Union-Next Generation EU (Ministry of Education, Youth and Sports, NPO: EXCELES).

118        **Conflicts of Interest**

119        The authors have no conflict of interests to be declared.



120       **References**

- 121    1.    Löffler MC, Betz MJ, Blondin DP, et al. Challenges in tackling energy expenditure as obesity  
122        therapy: From preclinical models to clinical application. *Mol Metab.* 2021;51.  
123        doi:10.1016/J.MOLMET.2021.101237
- 124    2.    Burrige K, Christensen SM, Golden A, Ingersoll AB, Tondt J, Bays HE. Obesity history, physical  
125        exam, laboratory, body composition, and energy expenditure: An Obesity Medicine Association  
126        (OMA) Clinical Practice Statement (CPS) 2022. *Obesity pillars.* 2022;1.  
127        doi:10.1016/J.OBPILL.2021.100007
- 128    3.    Compher C, Frankenfield D, Keim N, Roth-Yousey L. Best practice methods to apply to  
129        measurement of resting metabolic rate in adults: a systematic review. *J Am Diet Assoc.*  
130        2006;106(6):881-903. doi:10.1016/J.JADA.2006.02.009
- 131    4.    Marra M, Cioffi I, Sammarco R, et al. Are Raw BIA Variables Useful for Predicting Resting  
132        Energy Expenditure in Adults with Obesity? *Nutrients.* 2019;11(2):216. doi:10.3390/NU11020216
- 133    5.    Judges D, Knight A, Graham E, Goff LM. Estimating energy requirements in hospitalised  
134        underweight and obese patients requiring nutritional support: a survey of dietetic practice in the  
135        United Kingdom. *Eur J Clin Nutr.* 2011;66(3):394-398. doi:10.1038/ejcn.2011.211
- 136    6.    Bendavid I, Lobo DN, Barazzoni R, et al. The centenary of the Harris-Benedict equations: How to  
137        assess energy requirements best? Recommendations from the ESPEN expert group. *Clin Nutr.*  
138        2021;40(3):690-701. doi:10.1016/J.CLNU.2020.11.012
- 139    7.    Jésus P, Achamrah N, Grigioni S, et al. Validity of predictive equations for resting energy  
140        expenditure according to the body mass index in a population of 1726 patients followed in a  
141        Nutrition Unit. *Clin Nutr.* 2015;34(3):529-535. doi:10.1016/J.CLNU.2014.06.009
- 142    8.    Frankenfield D, Roth-Yousey L, Compher C. Comparison of predictive equations for resting  
143        metabolic rate in healthy nonobese and obese adults: A systematic review. *J Am Diet Assoc.*  
144        2005;105(5):775-789. doi:10.1016/j.jada.2005.02.005
- 145    9.    Peters M, Godfrey C, McInerney P, Baldini Soares C, Khalil H, Parker D. *JBI Manual for*  
146        *Evidence Synthesis.* JBI; 2020. doi:10.46658/jbimes-20-01
- 147    10.   Tricco AC, Lillie E, Zarin W, et al. PRISMA Extension for Scoping Reviews (PRISMA-ScR):  
148        Checklist and Explanation. *Ann Intern Med.* 2018;169(7):467-473. doi:10.7326/M18-0850

149      **Appendices**

150      *Appendix I: Search Strategy*

151      *Appendix II: PRISMA-P Checklist*
